# Supplementary material for: Tailored synthesis of well-faceted single crystals of Fe3O4 and their application in p-nitrophenol reduction
Source: Royal Society of Chemistry journal article supplement (doi:10.1039/c6ra03770d), 2016-01-01
Supplement: c6ra03770d1.pdf [file c6ra03770d1.pdf]

## Supporting Information

### **Tailored synthesis of well-faceted single crystals of Fe<sub>3</sub>O<sub>4</sub> and their application in p-nitrophenol reduction**

*Jun Liang\**, *Ajuan Yue*, *Qingcheng Wang*, *Shuang Song*, and *Li Li\**

*<sup>b</sup>College of Chemistry and Chemical Engineering, Ningxia University, Yinchuan 750021, China.*

*Email: junliang@nxu.edu.cn (J.Liang) ; li\_l@nxu.edu.cn*

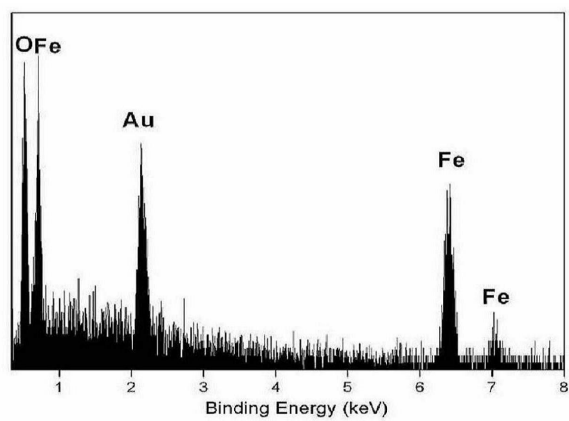

**Figure S1.** EDX spectrum of the as-obtained  $\text{Fe}_3\text{O}_4$  samples.

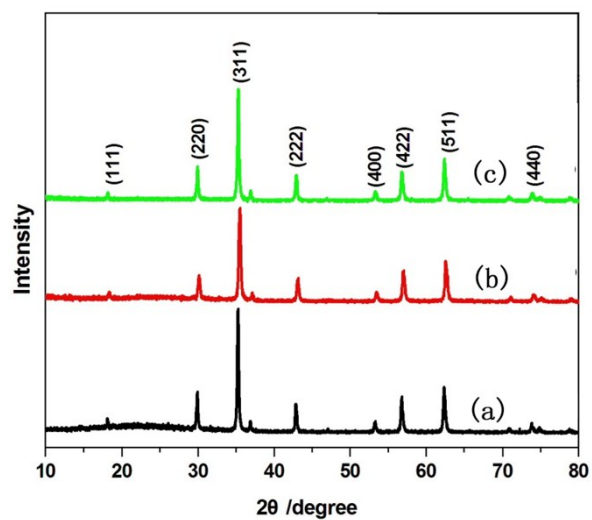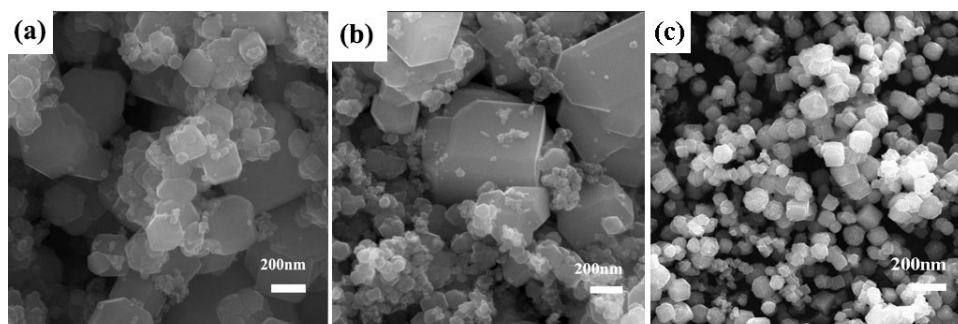

**Figure S2.** XRD patterns and SEM images of the  $\text{Fe}_3\text{O}_4$  products obtained at 413 K with different hydrothermal system: (a)  $\text{H}_2\text{O}$ , (b)  $\text{H}_2\text{O}$ -ethanolamine, and (c)  $\text{H}_2\text{O}$ -diethanolamine.

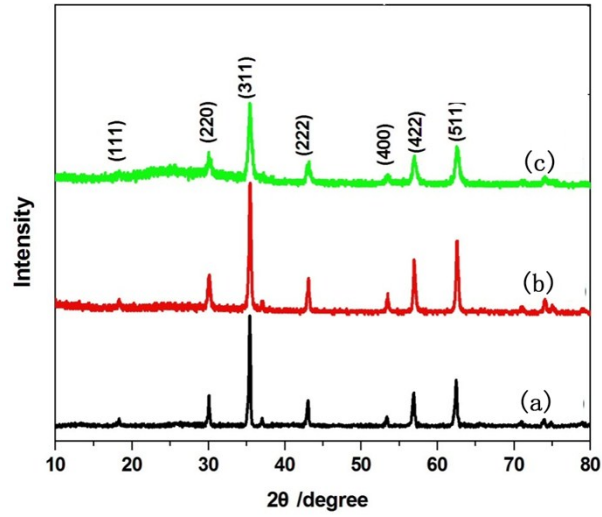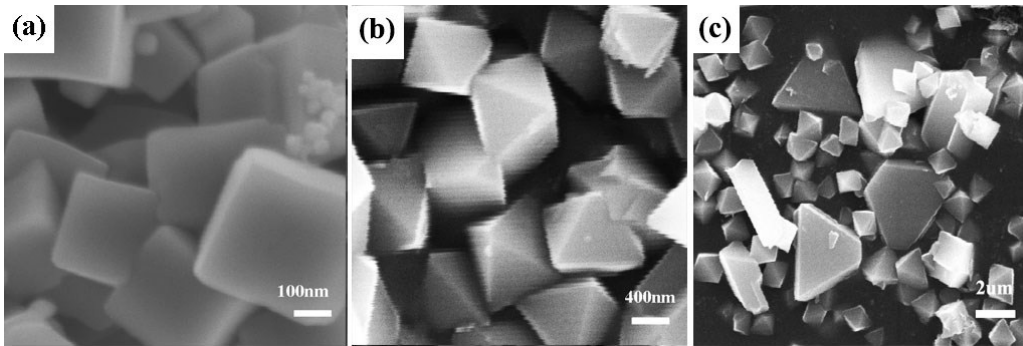

**Figure S3.** XRD patterns and SEM images of the  $\text{Fe}_3\text{O}_4$  products obtained at 413 K with different NaOH amount: (a) 0.0 g, (b) 0.20 g, and (c) 0.4 g.

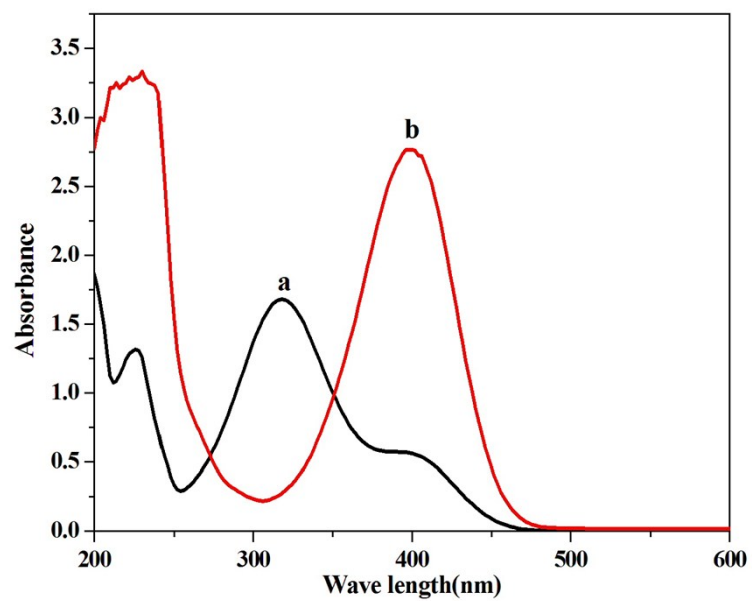

**Figure S4.** UV-Vis absorption spectra of p-nitrophenol before (a) and after (b) adding  $\text{N}_2\text{H}_4$  and NaOH solution

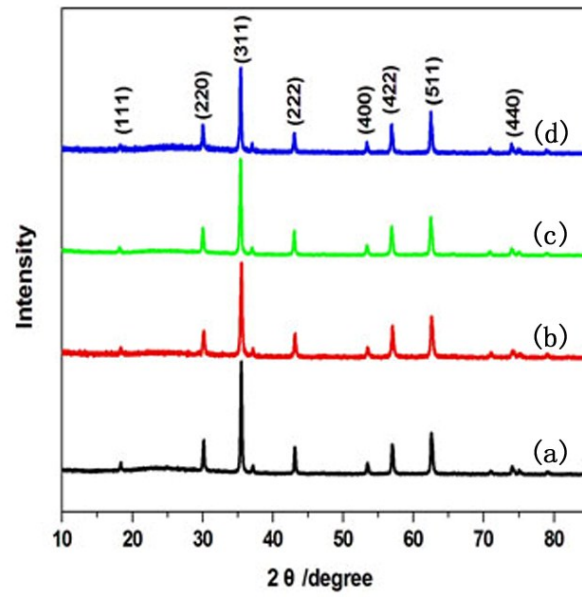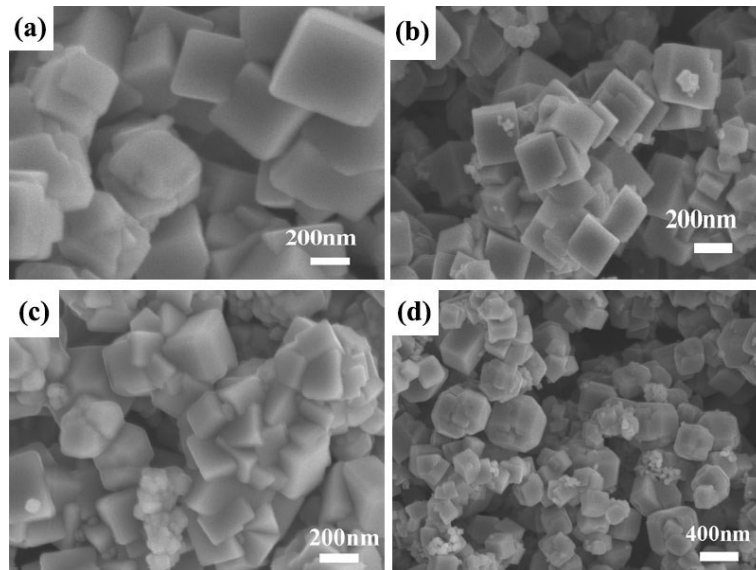

**Figure S5.** XRD patterns and SEM images of the  $\text{Fe}_3\text{O}_4$  products obtained at different hydrothermal temperatures: (a) 393 K, (b) 413 K, (c) 433 K, and (d) 453 K.
